# Supplementary material for: Simultaneous Detection of RIG-1, MDA5, and IFIT-1 Expression Is a Convenient Tool for Evaluation of the Interferon-Mediated Response
Source: MDPI journal article supplement (doi:10.3390/v14102090), 2022-09-21
Supplement: s1 [file s1]

# Simultaneous Detection of RIG-1, MDA5, and IFIT-1 Expression Is a Convenient Tool for Evaluation of the Interferon-Mediated Response

## Supplementary files

**Table S1. Primers and probes**

| Target                                                                                                                                                                                                                                                                                                              | Position        | Sequence 5'-3'                            |
|---------------------------------------------------------------------------------------------------------------------------------------------------------------------------------------------------------------------------------------------------------------------------------------------------------------------|-----------------|-------------------------------------------|
| <b>RIG-1 (DDX58)</b><br><i>NM_014314.4*</i><br><br><i>NM_001385907.1</i><br><i>NM_001385910.1</i><br><i>NM_001385912.1</i><br><i>NM_001385913.1</i><br><i>NM_001385914.1</i>                                                                                                                                        | qH_RIG1_F1940   | GAGCACTTGTGGACGCTTTA                      |
|                                                                                                                                                                                                                                                                                                                     | qH_RIG1_R2053   | ATACACTTCTGTGCCGGGAG                      |
|                                                                                                                                                                                                                                                                                                                     | qH_RIG1_O2002   | (ROX)-CCTGGCATATTGACTGGACGTGGC-(BHQ2)     |
|                                                                                                                                                                                                                                                                                                                     |                 |                                           |
|                                                                                                                                                                                                                                                                                                                     |                 |                                           |
| <b>MDA5 (IFIH-1)</b><br><i>NM_022168.4</i>                                                                                                                                                                                                                                                                          | qH_IFIH-1_F2667 | AAACCCATGACACAGAATGAACA                   |
|                                                                                                                                                                                                                                                                                                                     | qH_IFIH-1_R2864 | TGTGAGCAACCAGGACGTAG                      |
|                                                                                                                                                                                                                                                                                                                     | qH_IFIH-1_O2744 | (Cy5.5)-CACAGTGGCAGAAGAAGGTCTGGA-(BHQ3)   |
| <b>IFIT-1</b><br><i>NM_001548.5*</i><br><br><i>NM_001270927.2</i><br><i>NM_001270928.2</i><br><i>NM_001270929.2</i><br><i>NM_001270930.2</i>                                                                                                                                                                        | qH_IFIT-1_F1376 | AAACTTCGGAGAAAGGCATTAGAT                  |
|                                                                                                                                                                                                                                                                                                                     | qH_IFIT-1_R1540 | TGAAATGAAATGTGAAAGTGGCTG                  |
|                                                                                                                                                                                                                                                                                                                     | qH_IFIT-1_O1479 | (HEX)-CCTGAGACTGGCTGCTGACTTTGAGAAC-(BHQ1) |
|                                                                                                                                                                                                                                                                                                                     |                 |                                           |
|                                                                                                                                                                                                                                                                                                                     |                 |                                           |
| <b>ANXA-1</b><br><i>NM_000700.3</i>                                                                                                                                                                                                                                                                                 | qH_ANXA-1_F750  | ACCACCAGAAGCTATCCACAA                     |
|                                                                                                                                                                                                                                                                                                                     | qH_ANXA-1_R928  | CGAGTTCCAACACCTTTCATGG                    |
|                                                                                                                                                                                                                                                                                                                     | qH_ANXA-1_O879  | (Cy5.5)-AAGTGCGCCACAAGCAAACCAGC-(BHQ3)    |
| <b>poly IFNA</b><br><i>NM_024013.3*</i><br><br><i>NM_000605.4</i><br><i>NM_021068.4</i><br><i>NM_002169.3</i><br><i>NM_021002.2</i><br><i>NM_021057.2</i><br><i>NM_002170.4</i><br><i>NM_002171.2</i><br><i>NM_006900.4</i><br><i>NM_002172.3</i><br><i>NM_002173.3</i><br><i>NM_021268.2</i><br><i>NM_002175.2</i> | qH_IFNA_F294    | AGCCATCTCTGTCTCCATGAG                     |
|                                                                                                                                                                                                                                                                                                                     | qH_IFNA_R580    | TTTCTGCTCTGACAACCTCCC                     |
|                                                                                                                                                                                                                                                                                                                     |                 |                                           |
|                                                                                                                                                                                                                                                                                                                     |                 |                                           |
|                                                                                                                                                                                                                                                                                                                     |                 |                                           |
|                                                                                                                                                                                                                                                                                                                     |                 |                                           |
|                                                                                                                                                                                                                                                                                                                     |                 |                                           |
|                                                                                                                                                                                                                                                                                                                     |                 |                                           |
|                                                                                                                                                                                                                                                                                                                     |                 |                                           |
|                                                                                                                                                                                                                                                                                                                     |                 |                                           |
|                                                                                                                                                                                                                                                                                                                     |                 |                                           |
|                                                                                                                                                                                                                                                                                                                     |                 |                                           |
|                                                                                                                                                                                                                                                                                                                     |                 |                                           |
| <b>IFNB</b><br><i>NM_002176.4</i>                                                                                                                                                                                                                                                                                   | qH_IFNB1_F227   | TGCCTCAAGGACAGGATGAACT                    |
|                                                                                                                                                                                                                                                                                                                     | qH-IFNB1_R405   | TTAGCCAGGAGTTCTCAACAATAG                  |
|                                                                                                                                                                                                                                                                                                                     | qH_IFNB1_O285   | (HEX)-TCCAGAAGGAGGACGCCGATTGAC-(BHQ1)     |
| <b>IFNL2/3</b>                                                                                                                                                                                                                                                                                                      | qH_IFNL2/3_F347 | GAGGGCCAAAGATGCCTTAGAA                    |

|                                             |                 |                                                             |
|---------------------------------------------|-----------------|-------------------------------------------------------------|
| <i>NM_172138.2*</i>                         | qH_IFNL2/3_R518 | AGTGTGTCAGCGGTGGCCT                                         |
| <i>NM_001346937.2</i><br><i>NM_172139.4</i> | qH_IFNL2/3_O453 | (HEX)-GCAGCTGCAGGTGAGGGAGC-(BHQ1)                           |
| <b>MxA</b><br><i>NM_001144925.2*</i>        | qH_MxA_F2345    | GAGACAATCGTGAAACAGCAAATCA                                   |
|                                             | qH_MxA_R2449    | TATCGAAACTCTGTGAAAGCAAGC                                    |
| <i>NM_002462.5</i><br><i>NM_001178046.3</i> | qH_MxA_O2373    | (HEX)- CACTGGAAGAGCCGGCTGGGATATG-(BHQ1)                     |
| <b>SOCS-1</b><br><i>NM_003745.2</i>         | qH_SOCS-1_F1030 | CCTGGTTGTTGTAGCAGCTTA                                       |
|                                             | qH_SOCS-1_R1132 | CCTGGTTTGTGCAAAGATACTG                                      |
|                                             | qH_SOCS-1_O1093 | (ROX)-CCTGGTTGTTGTAGCAGCTTA-(BHQ2)                          |
| <b>ACTB</b><br><i>NM_001101.5</i>           | qH_ACTB_F353    | TCTACAATGAGCTGCGTGTGGCTCCC                                  |
|                                             | qH_ACTB_R489    | AGCAACGTACATGGCTGGGGTGTGAA                                  |
|                                             | qH_ACTB_O419    | (FAM)-<br>CCAAGGCCAACCGCGAGAAGATGACCCAGAT-CAT-<br>(BHQ1)    |
| <b>GAPDH</b><br><i>NM_002046.7*</i>         | qH_GAPDH_F23    | CAGTCAGCCGCATCTTCTTTTTCGTCG                                 |
|                                             | qH_GAPDH_R152   | CAGAGTTAAAAGCAGCCCTGGTGACCAG                                |
|                                             | qH_GAPDH_78     | (FAM)-<br>TGGGGAAGGTGAAGGTCTGGAGTCAACGGATTTG-<br>GTC-(BHQ1) |

\* primers and probe positions are specified in the sequence of this transcript

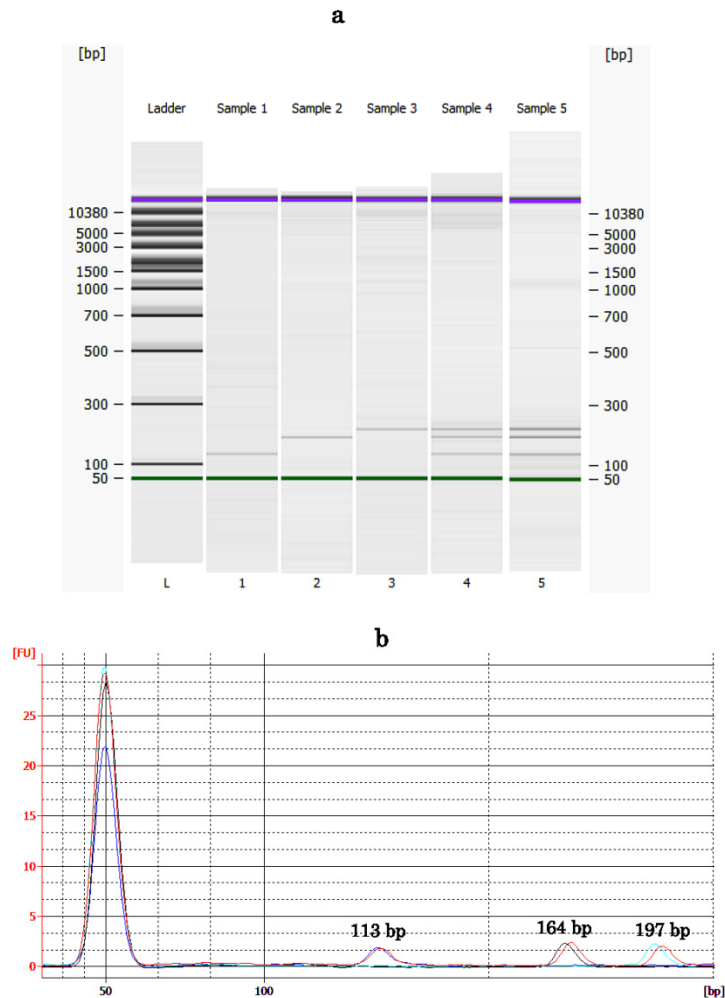

**Figure S1. Three specific amplicon products (RIG-1, IFIT, MDA5) are amplified by the developed multiplex qPCR assay.** (a) Capillary electrophoresis. Samples: 1 – RIG-1 monoplex (113 bp); 2 – IFIT monoplex (164 bp); 3 – MDA5 monoplex (197 bp); 4 – mix of monoplex products; 5 – multiplex reaction products. (b) electropherogram showing product peaks and their proper coincidence: RIG-1 (dark blue); IFIT (green); MDA5 (light blue); and multiplex PCR (red).

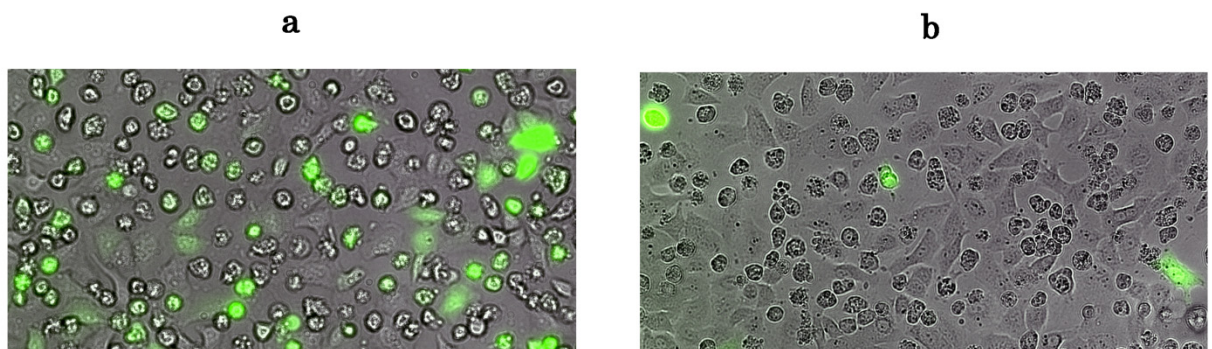

**Figure S2. Transfection of A549 cells with synthetic RNA coding GFP leads to stable translation 24 hours after transfection.** (a) live cell microscopy of A549 cells transfected with IVT-RNA-GFP. (b) live cell microscopy of A549 cells transfected with IVT-saRNA-GFP

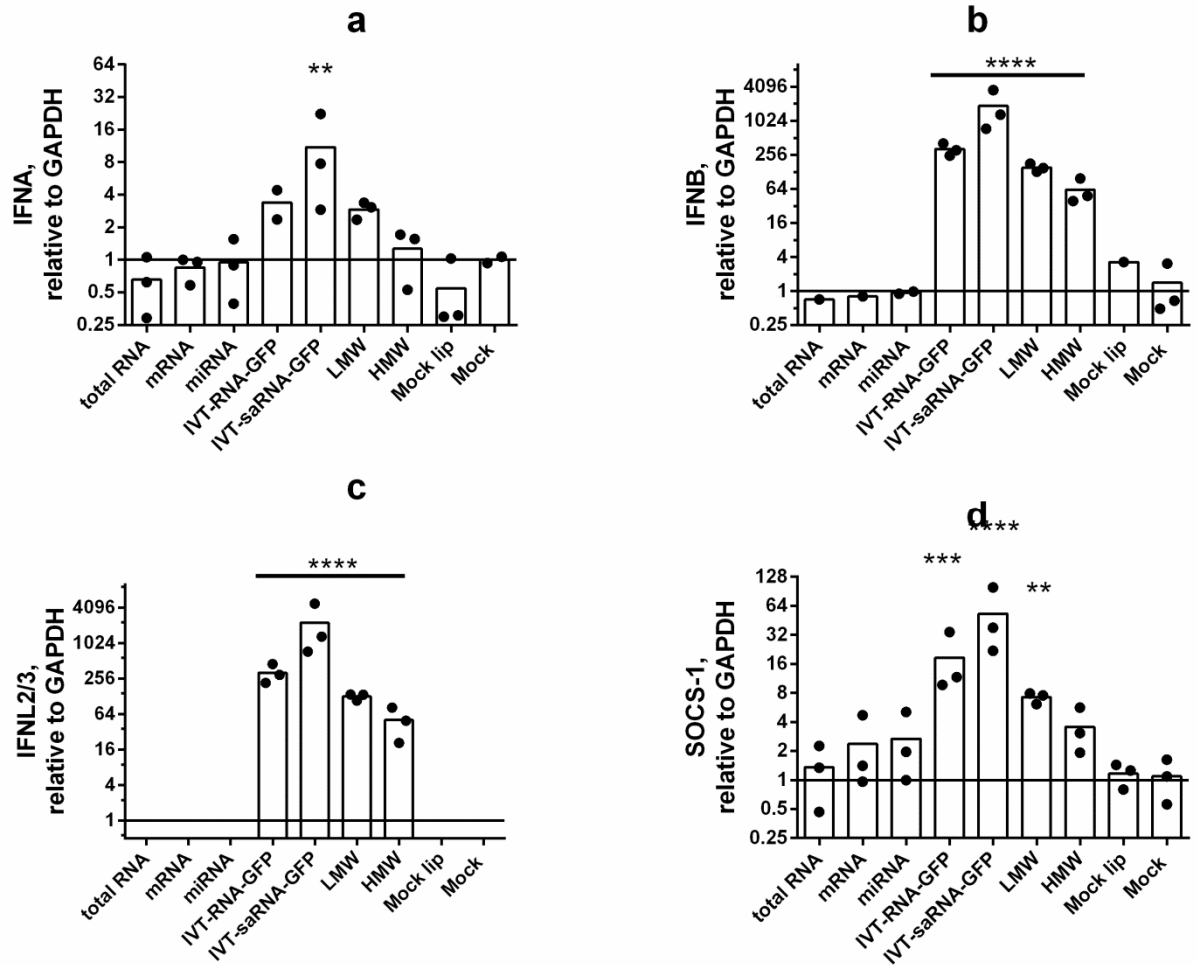

**Figure S3. Synthetic RNAs induce IFN expression.** Expression levels of IFNA (a), IFNB (b), IFNL2/3 (c), and SOCS-1 (d) were analyzed at 24 hours post transfection. Gene expression was analyzed via the  $\Delta\Delta C_t$  method (relative to GAPDH). Statistical significance (p-value) was determined by ordinary one-way ANOVA, followed by a pairwise Holm-Sidak's multiple comparisons test: \*\*\*\* — adjusted P Value < 0.0001; \*\*\* — < 0.001; \*\* — < 0.01 compared to Mock. Mock – intact cells that were cultured in the same conditions and were not transfected (instead, sterile medium F12K was added). At least three biological replicates were used for each experimental data point. Data are represented as median.

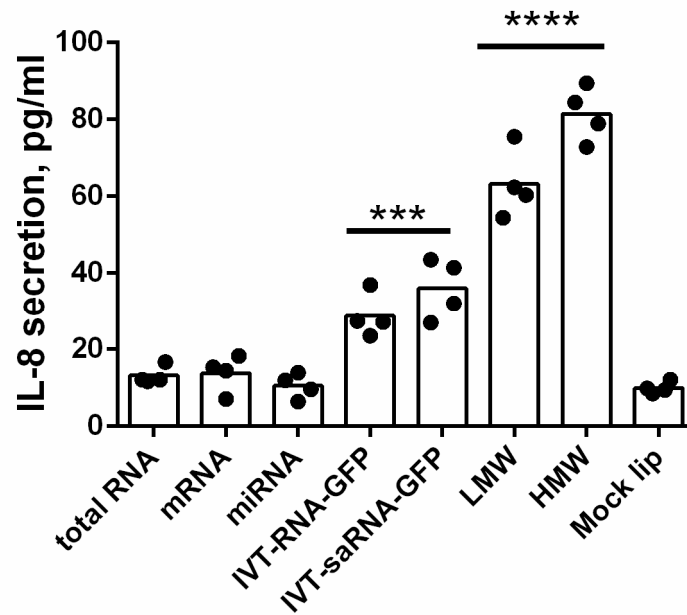

**Figure S4. IL-8 secretion is elevated in response to exogenous RNA.** IL-8 levels in supernatants were measured by ELISA 24 hours post transfection. Statistical significance (p-value) was determined by ordinary one-way ANOVA, followed by Holm-Sidak's multiple comparisons test: \*\*\*\* — adjusted P Value < 0.0001; \*\*\* — < 0.001 compared to Mock lip. Mock lip – cells that were cultured in the same conditions and were transfected only with lipofectamin and sterile medium. At least three biological replicates were used for each experimental data point. Data are represented as mean  $\pm$  SD.

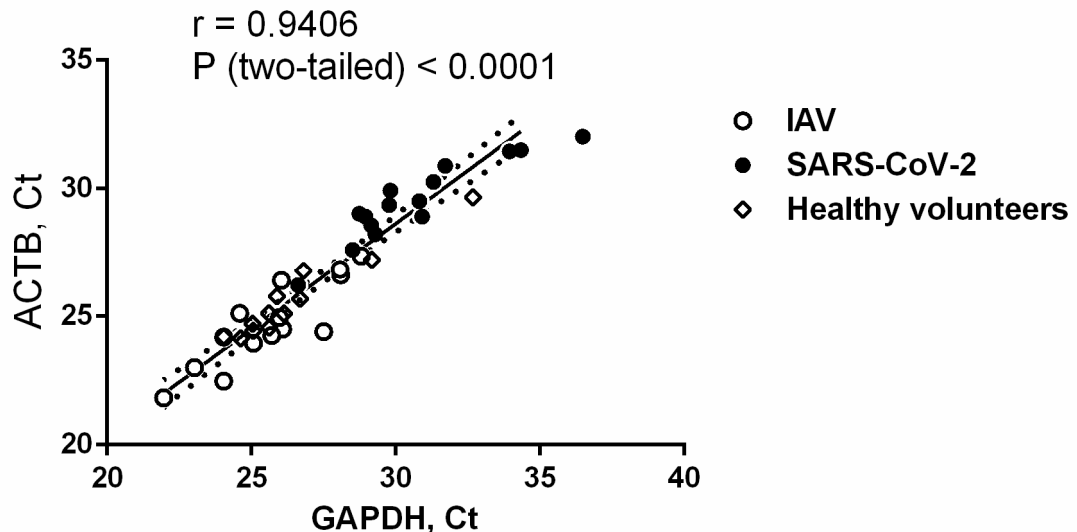

**Figure S5. The selected reference genes, GAPDH and ACTB, are in good correlation to each other.** GAPDH Ct values are indicated on the x-axis; ACTB Ct values are indicated on the y-axis (a). Spearman correlation coefficient and P value are shown on the graph.

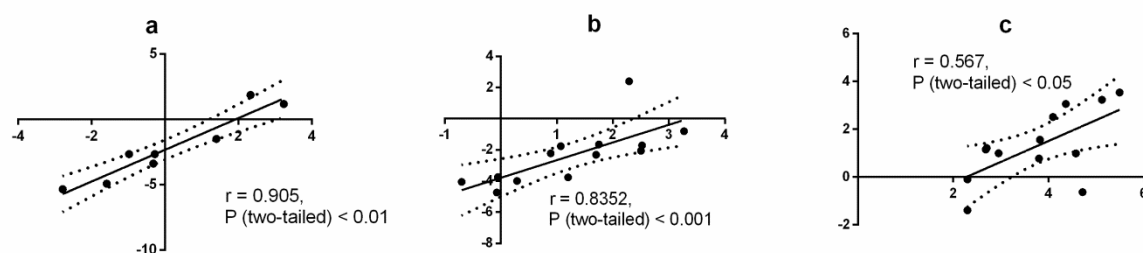

**Figure S6. Correlation between IFIT-1 and RIG-1 expression with COVID-19 (a), influenza (b), or healthy volunteers (c) at the early phase of illness (3-4 days post symptoms onset).** RIG-1 delta Ct values are indicated on the x-axis. IFIT-1 delta Ct values are indicated on the y-axis. Spearman correlation coefficient and P value are shown on the graph. The high  $R^2$  value indicates a closer relationship between RIG-1 and IFIT-1 expression.

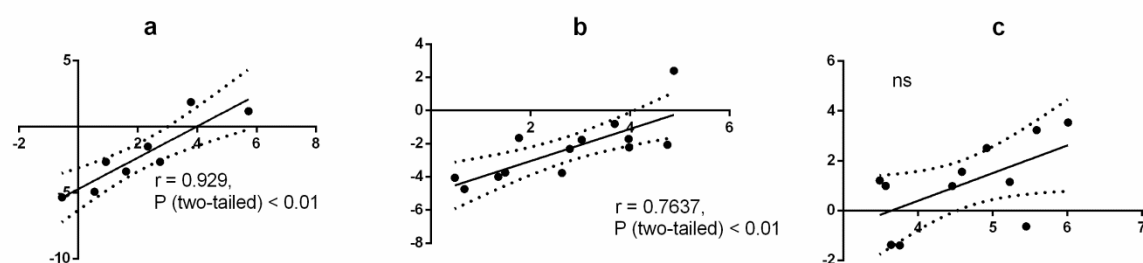

**Figure S7. Correlation between IFIT-1 and MDA5 expression with COVID-19 (a), influenza (b), or healthy volunteers (c) at the early phase of illness (3-4 days post symptoms onset).** MDA5 delta Ct values are indicated on the x-axis. IFIT-1 delta Ct values are indicated on the y-axis. The elevated  $R^2$  value indicates a closer relationship between RIG-1 and IFIT-1 expression.

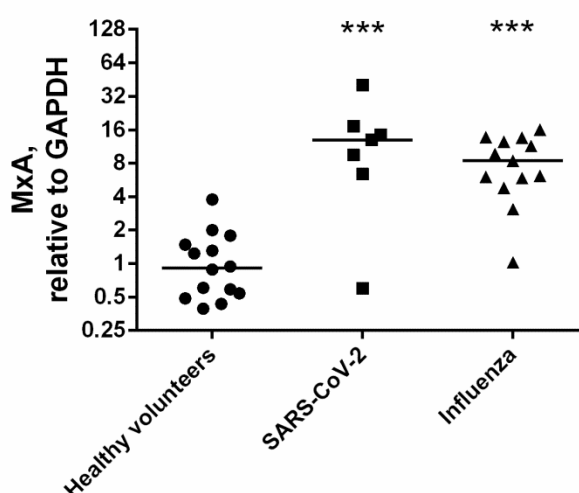

**Figure S8 MxA is reliable marker of viral infection expression.** Gene expression of MxA in WBCs was analyzed via the  $\Delta\Delta Ct$  method (relative to GAPDH). Statistical significance (p-value) was determined by Kruskal-Wallis test, followed by Dunn's multiple comparisons test; \*\*\* — adjusted P Value < 0.001 compared to healthy volunteers. Data are represented as median.
